# Supplementary material for: Study of Triticum aestivum Resistome in Response to Wheat dwarf India Virus Infection
Source: MDPI journal article supplement (doi:10.3390/life11090955), 2021-09-13
Supplement: s1 [file s1]

Article

# Study of *Triticum aestivum* Resistome in Response to Wheat Dwarf India Virus Infection

Jitendra Kumar <sup>1,2</sup>, Krishan Mohan Rai <sup>3</sup>, Shahryar F. Kianian <sup>4,\*</sup> and Sudhir P. Singh <sup>1,5,\*</sup>

<sup>1</sup> National Agri-Food Biotechnology Institute, SAS Nagar, Mohali 140306, India

<sup>2</sup> Department of Agronomy and Plant Genetics, University of Minnesota, St. Paul, MN 55108, USA; jkumar@umn.edu

<sup>3</sup> Department of Microbial and Plant Biology, University of Minnesota, St. Paul, MN 55108, USA; Kmohanra@umn.edu

<sup>4</sup> USDA-ARS Cereal Disease Laboratory, St. Paul, MN 55108, USA

<sup>5</sup> Center of Innovative and Applied Bioprocessing, SAS Nagar, Mohali 140306, India

\* Correspondence: shahryar.kianian@usda.gov (S.F.K.); pratapsudhir@gmail.com (S.P.S.)

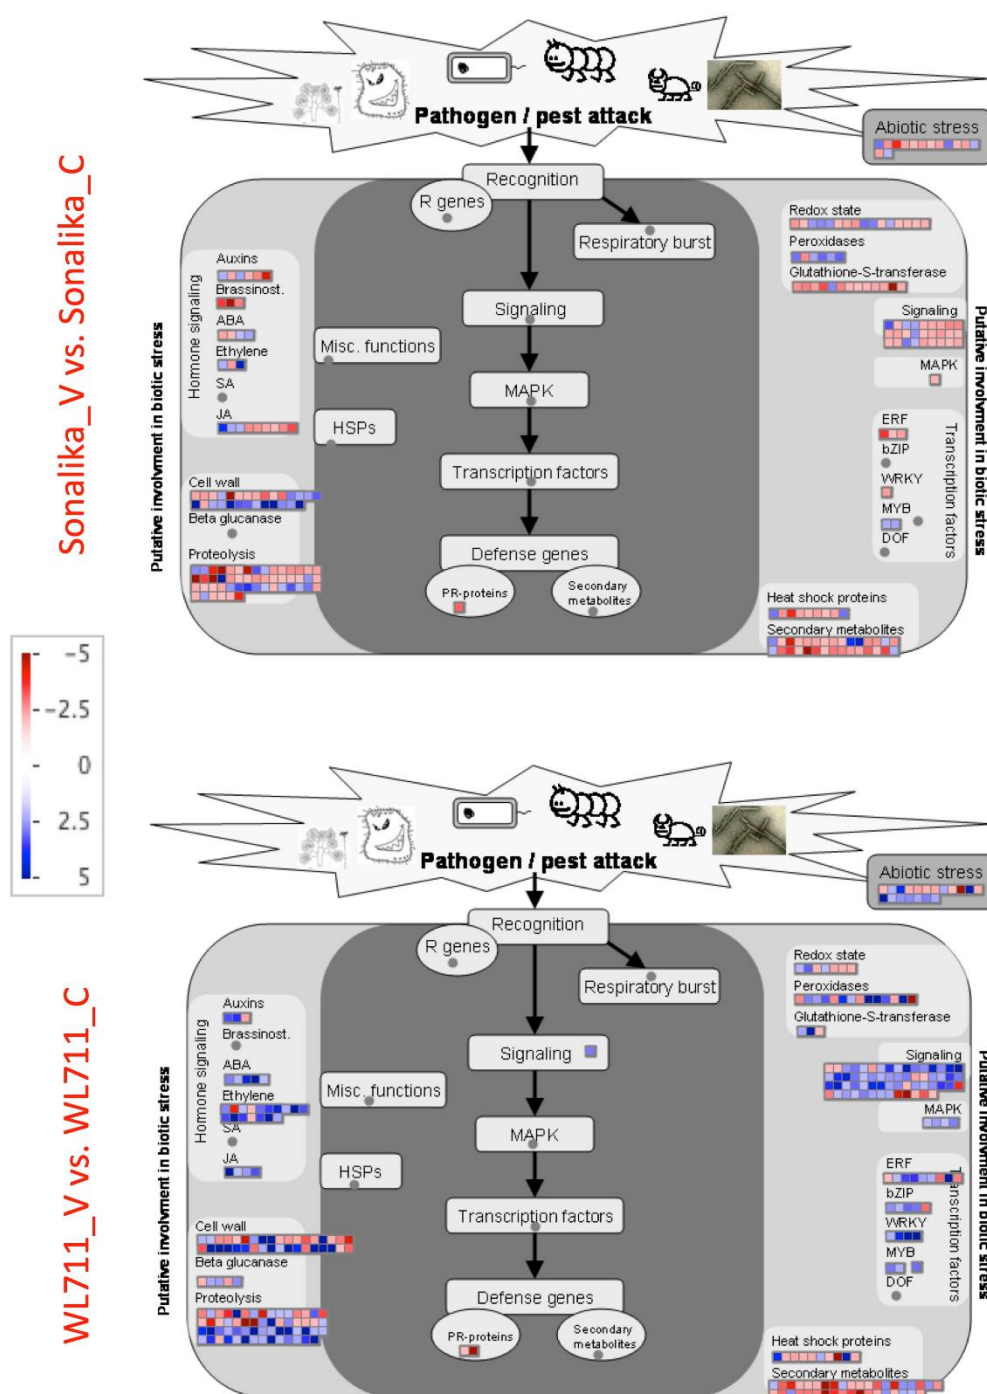

**Figure S1.** MapMan overview showing differentially expressed probesets related to biotic and abiotic stress in Sonalika\_V vs. Sonalika\_C and WL711\_V vs. WL711\_C. Up-regulated genes are shown by light to deep blue color boxes and the down-regulated genes are shown by light to deep red color boxes. Color intensity show the level of expressions as indicated by the intensity bar. Genes involved in same functions are clubbed together.

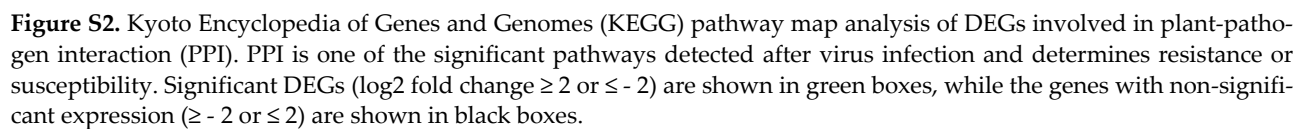

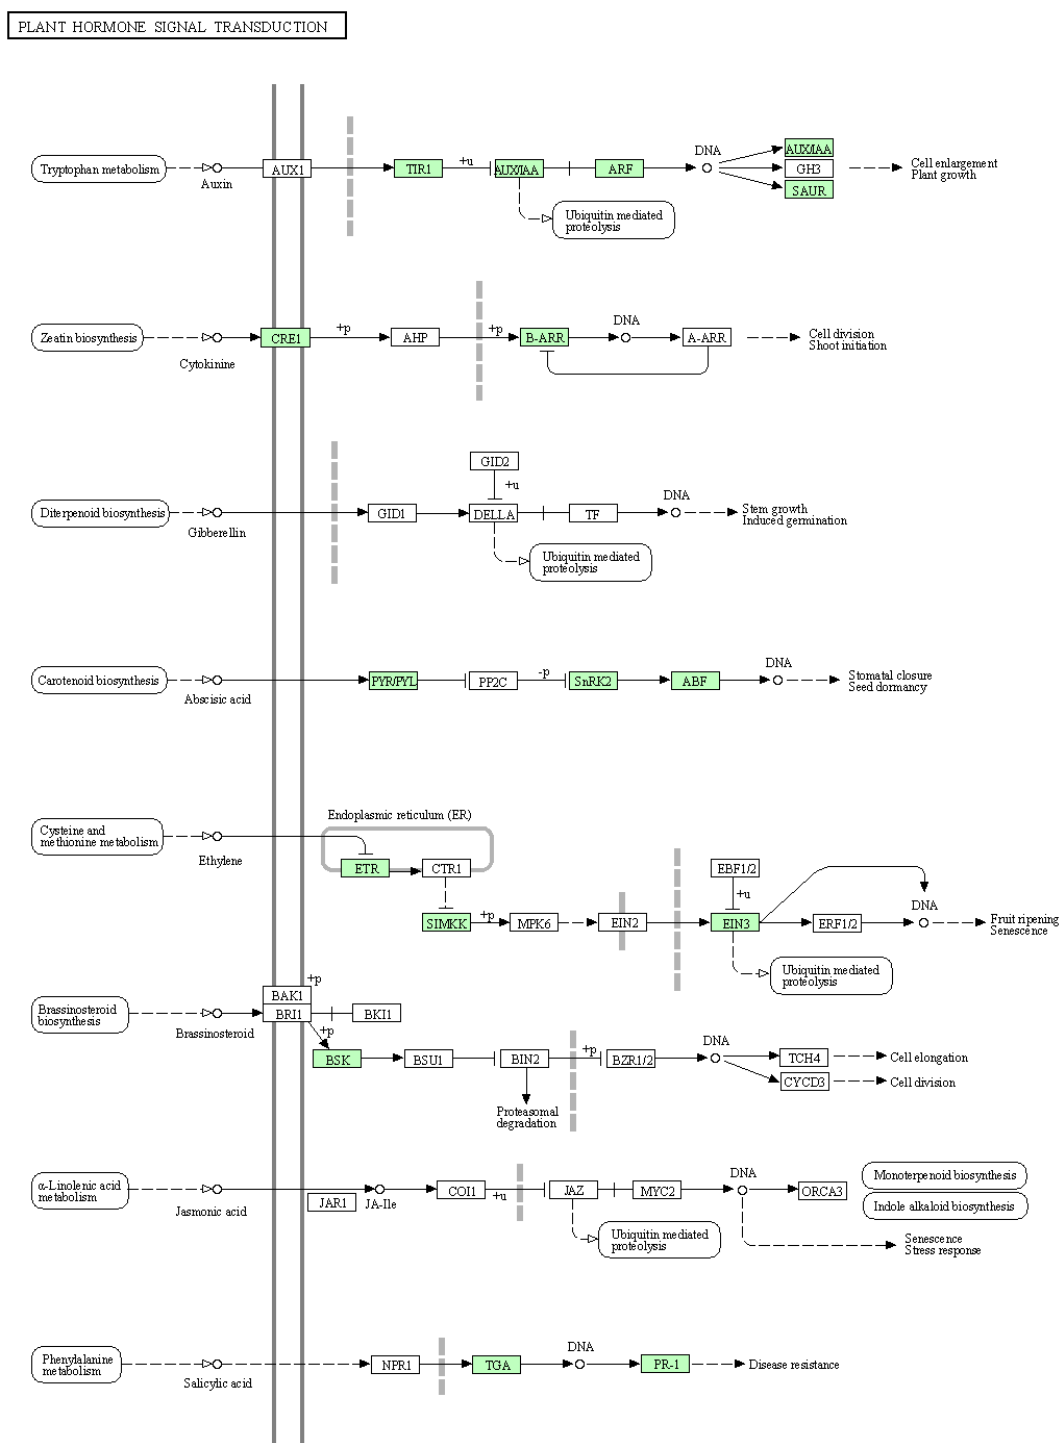

**Figure S3.** Kyoto Encyclopedia of Genes and Genomes (KEGG) pathway map analysis of DEGs involved in hormone signal transduction, which is one of the significant pathways detected after virus infection, and determines resistance or susceptibility. Significant DEGs ( $\log_2$  fold change  $\geq 2$  or  $\leq -2$ ) are shown in green boxes, while the genes with non-significant expression ( $\geq -2$  or  $\leq 2$ ) are shown in black boxes.

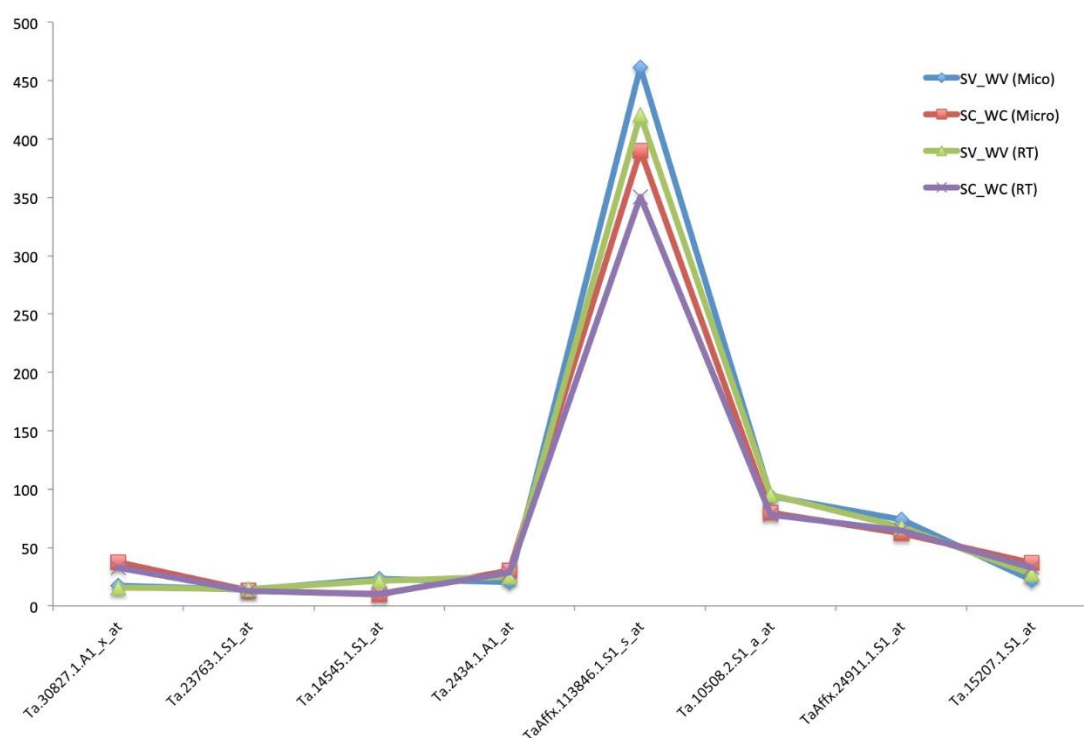

**Figure S4.** Quantitative real-time PCR based validation of gene expression. The expression values estimated by microarray (micro) are compared with real-time (RT). The conditions are SV\_WV (Sonalika virus vs. WL711 virus) and SC\_WC (Sonalika control vs. WL711 control).

**Table S1.** List of primers used in real-time PCR assays.

| Probe ID/Gene Name              | Forward Primer         | Reverse Primer        |
|---------------------------------|------------------------|-----------------------|
| <i>Randomly selected genes</i>  |                        |                       |
| Ta.30827.1.A1_x_at              | CCGTGACAGGGCTAGGTAAA   | ATGGCCCAGTCATTATCTGC  |
| Ta.23763.1.S1_at                | CTCCTCCGCCAGCAGTTC     | CGGCATGATGCTCCTCAG    |
| Ta.14545.1.S1_at                | CACATCGAACGAGACCAAGA   | GAGGCCAGCTCGGACAAG    |
| Ta.2434.1.A1_at                 | GCACGGTGCACTGACTATCT   | TGCATCGTATTCCTCCCAT   |
| TaAffx.113846.1.S1_s_at         | CGCGACTAGTCAGCCAATC    | GAGAGGGACAGAGGACGGTA  |
| <i>Uncharacterized proteins</i> |                        |                       |
| Ta.10508.2.S1_a_at              | GCGCATGAGCAAGAGTTACC   | GTTTCAGGGCTGGACACAAAT |
| TaAffx.24911.1.S1_at            | TCGAATGCTGCTGAAACAAG   | GCAACACATCATAACGGCATC |
| Ta.15207.1.S1_at                | CCATGGCTATGGAGAGGTTC   | CATCTGCTTGCCAGTGAAGA  |
| <i>Internal control</i>         |                        |                       |
| EF-1 $\alpha$                   | GCTGTCAAGTTTGCTGAGATCC | GTACTGAGCGAAGGTCTCCAC |

**Table S2.** Uncharacterized protein in our dataset with more than 10 fold differential expression in response to virus infection.

| UniProt Desc            | ID                    | SV_WV  |
|-------------------------|-----------------------|--------|
| Uncharacterized protein | TaAffx.103568.1.S1_at | 98.11  |
|                         | Ta.10508.2.S1_a_at    | 94.31  |
|                         | TaAffx.24911.1.S1_at  | 74.19  |
|                         | Ta.20262.2.S1_at      | 64.71  |
|                         | Ta.22662.1.S1_at      | 56.77  |
|                         | Ta.23165.2.S1_x_at    | 51.56  |
|                         | TaAffx.100436.1.S1_at | 51.27  |
|                         | Ta.14446.1.A1_at      | 42.14  |
|                         | Ta.883.1.S1_at        | 41.98  |
|                         | Ta.23165.3.S1_x_at    | 33.3   |
|                         | TaAffx.12907.1.A1_at  | 29.87  |
|                         | TaAffx.74284.1.S1_at  | 26.14  |
|                         | Ta.787.1.S1_x_at      | 25.74  |
|                         | Ta.22462.1.S1_at      | 22.32  |
|                         | Ta.15207.1.S1_at      | 22.05  |
|                         | Ta.28842.1.S1_at      | 21.56  |
|                         | Ta.896.3.S1_a_at      | 19     |
|                         | Ta.21376.2.A1_a_at    | 18.31  |
|                         | Ta.1112.1.S1_at       | 17.13  |
|                         | Ta.21376.1.S1_at      | 16.81  |
|                         | Ta.23904.1.S1_at      | 16.06  |
|                         | Ta.17295.1.S1_at      | 15.4   |
|                         | Ta.30770.1.S1_at      | 15.1   |
|                         | Ta.7124.1.A1_at       | 14.57  |
|                         | Ta.22230.1.S1_at      | 14.5   |
|                         | TaAffx.28007.1.S1_at  | 14.37  |
|                         | Ta.21996.1.S1_at      | 13.99  |
|                         | Ta.9590.1.S1_at       | 13.76  |
|                         | Ta.28983.2.S1_x_at    | 13.45  |
|                         | TaAffx.27177.1.S1_at  | 13.25  |
|                         | Ta.28983.2.S1_at      | 12.99  |
|                         | Ta.22966.3.S1_at      | 12.57  |
|                         | TaAffx.93984.1.S1_at  | 11.83  |
|                         | Ta.11967.1.S1_at      | 11.13  |
|                         | Ta.4606.1.A1_at       | 11.09  |
|                         | Ta.12102.1.S1_a_at    | 10.89  |
|                         | TaAffx.119440.1.A1_at | -10.41 |
|                         | Ta.16930.1.S1_at      | -10.81 |
|                         | TaAffx.4964.1.S1_at   | -10.83 |
|                         | TaAffx.97191.1.S1_at  | -10.87 |
|                         | TaAffx.92234.1.A1_at  | -11.28 |
|                         | Ta.26429.1.S1_at      | -13    |
|                         | TaAffx.56231.1.S1_at  | -13.05 |
|                         | Ta.25828.1.A1_at      | -13.92 |
|                         | Ta.6254.1.S1_at       | -14.21 |
|                         | Ta.25891.1.S1_at      | -14.59 |
|                         | TaAffx.25418.1.S1_at  | -15.15 |
|                         | Ta.3242.1.A1_a_at     | -15.6  |

---

|                        |         |
|------------------------|---------|
| Ta.16175.1.A1_x_at     | -15.78  |
| Ta.6179.1.S1_at        | -15.81  |
| Ta.15173.1.A1_at       | -16.26  |
| Ta.12024.1.A1_at       | -19.46  |
| TaAffx.50281.1.S1_at   | -20.01  |
| Ta.6515.1.S1_at        | -20.52  |
| Ta.3527.1.S1_at        | -20.59  |
| Ta.30500.1.S1_at       | -20.6   |
| TaAffx.82405.1.S1_s_at | -20.6   |
| Ta.23352.1.S1_at       | -22.1   |
| Ta.6645.1.A1_at        | -22.51  |
| Ta.3830.2.S1_x_at      | -23.02  |
| Ta.14725.1.S1_at       | -27.09  |
| TaAffx.107501.1.S1_at  | -34.07  |
| Ta.9531.1.A1_at        | -36.35  |
| TaAffx.58902.1.S1_x_at | -41.39  |
| Ta.3242.3.A1_at        | -51.69  |
| Ta.25193.1.S1_at       | -52.47  |
| Ta.3830.1.S1_a_at      | -53.95  |
| Ta.8331.1.S1_at        | -55.26  |
| TaAffx.56616.1.S1_at   | -76.83  |
| Ta.3242.1.A1_at        | -107.34 |

---
